# Supplementary material for: MST4 negatively regulates the EMT, invasion and metastasis of HCC cells by inactivating PI3K/AKT/Snail1 axis
Source: PubMed Central journal article supplement (PMC8210547; doi:10.7150/jca.60008), 2021-05-27
Supplement: jcav12p4463s1.pdf [file jcav12p4463s1.pdf]

## Supplementary Information

**Table S1 Overall survival in patients with sarcomatoid HCC**

| Case No.         | Sex       | Age (years) | Overall survival (months) |
|------------------|-----------|-------------|---------------------------|
| 1                | M         | 46          | 3                         |
| 2                | M         | 69          | 12                        |
| 3                | F         | 37          | 1.5                       |
| 4                | M         | 59          | 2.5                       |
| 5                | M         | 71          | 5                         |
| 6                | M         | 48          | 14                        |
| 7                | F         | 53          | 16                        |
| 8                | M         | 65          | 2                         |
| 9                | M         | 42          | 4                         |
| 10               | M         | 61          | 8                         |
| Ratios or median | F:M = 2:8 | 56 (37-71)  | 4.5 (1.5-16)              |

**Table S2 List of antibodies and suppliers  
used for immunohistochemistry (IHC) or immunofluorescence (IF)**

| <b>Antibody</b> | <b>Isotype</b> | <b>Suppliers</b>         | <b>Cat. No</b> | <b>Application</b> |
|-----------------|----------------|--------------------------|----------------|--------------------|
| MST4            | Rabbit IgG     | Abcam                    | ab52491        | WB、IHC、IF          |
| Ki67            | Rabbit IgG     | Thermo Fisher SCIENTIFIC | PA5-19462      | IHC                |
| CK8/18(CAM5.2)  | Mouse IgG      | BD Biosciences           | 349205         | IHC                |
| E-cadherin      | Mouse IgG      | Santa Cruz               | sc-21791       | IHC                |
| Vimentin        | Mouse IgG      | Santa Cruz               | sc-6260        | IHC                |
| Snail1          | Goat IgG       | Abcam                    | ab53519        | WB、IHC、IF          |
| E-cadherin      | Mouse IgG      | BD Biosciences           | 610182         | WB、IF              |
| N-cadherin      | Mouse IgG      | BD Biosciences           | 610920         | WB、IF              |
| Vimentin        | Mouse IgG      | BD Biosciences           | 562337         | WB、IF              |
| Fibronectin     | Mouse IgG      | BD Biosciences           | 610077         | WB、IF              |
| p-AKT(S473)     | Rabbit IgG     | CST                      | 4060S          | WB、IHC             |

**Table S3 List of antibodies and suppliers used for immunoblotting**

| <b>Antibody</b>  | <b>Isotype</b> | <b>Suppliers</b>                | <b>Cat. No</b> | <b>Application</b> |
|------------------|----------------|---------------------------------|----------------|--------------------|
| MST4             | Rabbit IgG     | Abcam                           | ab52491        | WB、IHC、IF          |
| Snail1           | Goat IgG       | Abcam                           | ab53519        | WB、IHC、IF          |
| Snail1           | Rabbit         | Cell Signaling Technology (CST) | 3879S          | WB                 |
| E-cadherin       | Mouse IgG      | BD Biosciences                  | 610182         | WB、IF              |
| N-cadherin       | Mouse IgG      | BD Biosciences                  | 610920         | WB、IF              |
| Vimentin         | Mouse IgG      | BD Biosciences                  | 562337         | WB、IF              |
| Fibronectin      | Mouse IgG      | BD Biosciences                  | 610077         | WB、IF              |
| E-cadherin       | Rabbit IgG     | Proteintech                     | 20874-1-AP     | WB、IF              |
| N-cadherin       | Rabbit IgG     | Proteintech                     | 22018-1-AP     | WB、IF              |
| Vimentin         | Rabbit IgG     | Proteintech                     | 10366-1-AP     | WB、IF              |
| Fibronectin      | Rabbit IgG     | Proteintech                     | 15613-1-AP     | WB、IF              |
| p-Akt (S473)     | Rabbit IgG     | CST                             | 4060S          | WB、IHC             |
| Akt (pan)        | Rabbit IgG     | CST                             | 4685S          | WB                 |
| p-GSK-3-beta(S9) | Rabbit IgG     | CST                             | 9323S          | WB                 |
| GSK-3-beta       | Rabbit IgG     | CST                             | 9315S          | WB                 |
| GAPGH            | Rabbit IgG     | Proteintech                     | 10494-1-AP     | WB                 |
